# Supplementary material for: Early detection of students’ mental health issues from a traditional daily health observation scheme in Japanese schools and its digitalization
Source: Frontiers journal article supplement (doi:10.3389/fpubh.2024.1430011), 2024-09-09
Supplement: Data_Sheet_1.PDF [file Data_Sheet_1.PDF]

## Supplementary Material

**Supplementary Table 1.** Model fit indices from 1-factor to 2-factor solutions for Patient Health Questionnaire (PHQ)

| Factor solutions        | 1-factor | 2-factor | Threshold <sup>(1)</sup> |
|-------------------------|----------|----------|--------------------------|
| Chi-square test p-value | <.001    | <.001    | >.05                     |
| CFI                     | .994     | 1.000    | >.90                     |
| RMSEA                   | .065     | .000     | <.08                     |
| SRMR                    | .016     | .002     | <.08                     |

*Note:* Model fit was tested using the comparative fit index (CFI), Tucker–Lewis index (TLI), the root-mean-square error of approximation (RMSEA), and Root Mean square Residual (SRMR).

1. Hu L, Bentler PM. Cutoff criteria for fit indexes in covariance structure analysis: Conventional criteria versus new alternatives. *Struct Equ Model* (1999) 6(1), 1–55. doi:10.1080/10705519909540118

**Supplementary Table 2.** Reliability and validity from 1-factor to 2-factor solutions for the Patient Health Questionnaire (PHQ)

| 1-factor           |      |      | 2-factor   |      |      |          |      |      |      |
|--------------------|------|------|------------|------|------|----------|------|------|------|
| Depression/Anxiety |      |      | Depression |      |      | Anxiety  |      |      | HTMT |
| $\alpha$           | CR   | AVE  | $\alpha$   | CR   | AVE  | $\alpha$ | CR   | AVE  |      |
| .818               | .820 | .538 | .627       | .638 | .474 | .793     | .795 | .660 | .930 |

*Note:* Reliability was evaluated using Cronbach's  $\alpha$  with a criterion value of .70 or higher<sup>(2)</sup> and composite reliability (CR) with a criterion value of .70 or higher.<sup>(3)</sup> Convergent validity was evaluated using the average variance extracted (AVE), with a criterion value of .50 or higher.<sup>(4)</sup> Discriminant validity was evaluated using the heterotrait-monotrait ratio of correlations (HTMT), with a criterion value of .85 or lower.<sup>(5)</sup>

In the two-factor solution, reliability and convergent validity were not sufficiently high for the depression subscale. Discriminant validity did not meet criterion values for the two-factor solution. Based on these results, we conclude that it is appropriate to treat the PHQ as a single factor.

2. Hair JF, Black WC, Babin BJ. Multivariate data analysis: A global perspective (7th ed.), Pearson Education. (2010).
3. Bagozzi RP, Yi Y. On the evaluation of structural equation models. *JAMS* (1988) 16;74–94. doi:10.1007/BF02723327
4. Fornell C, Larcker DF. Evaluating structural equation models with unobservable variables and measurement error. *J Mark Res* (1981) 18(1); 39–50.
5. Henseler J, Ringle CM, Sarstedt M. A new criterion for assessing discriminant validity in variance-based structural equation modeling. *J Acad Mark Sci* (2015) 43;115–135. doi:10.1007/s11747-014-0403-8
